# Supplementary material for: Intestinal Long-Chain Fatty Acids Act as a Direct Signal To Modulate Expression of the Salmonella Pathogenicity Island 1 Type III Secretion System
Source: PubMed Central journal article supplement — mBio. 2016 Feb 16;7(1):e02170-15. doi: 10.1128/mBio.02170-15 (PMC4752608; doi:10.1128/mbio.02170-15), 2016-02-16
Supplement: mbo001162701sf2.pdf [file mbo001162701sf2.pdf]

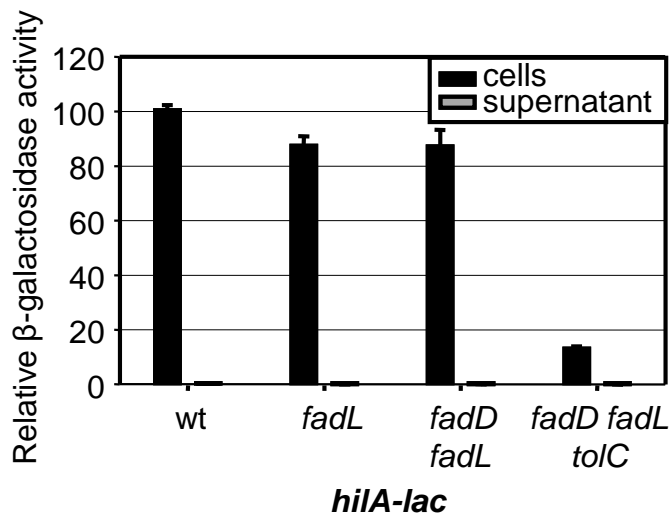

**Figure S2.** Accumulation of free LCFAs in the culture medium is not due to cell lysis. Average relative  $\beta$ -galactosidase activity determined in cells or supernatant from 3 replicate cultures per each strain submitted for metabolomics analysis. Strains used: JS749, JS2062, JS2063, JS2072.
