# Supplementary material for: Intestinal Long-Chain Fatty Acids Act as a Direct Signal To Modulate Expression of the Salmonella Pathogenicity Island 1 Type III Secretion System
Source: PubMed Central journal article supplement — mBio. 2016 Feb 16;7(1):e02170-15. doi: 10.1128/mBio.02170-15 (PMC4752608; doi:10.1128/mbio.02170-15), 2016-02-16
Supplement: mbo001162701sf3.pdf [file mbo001162701sf3.pdf]

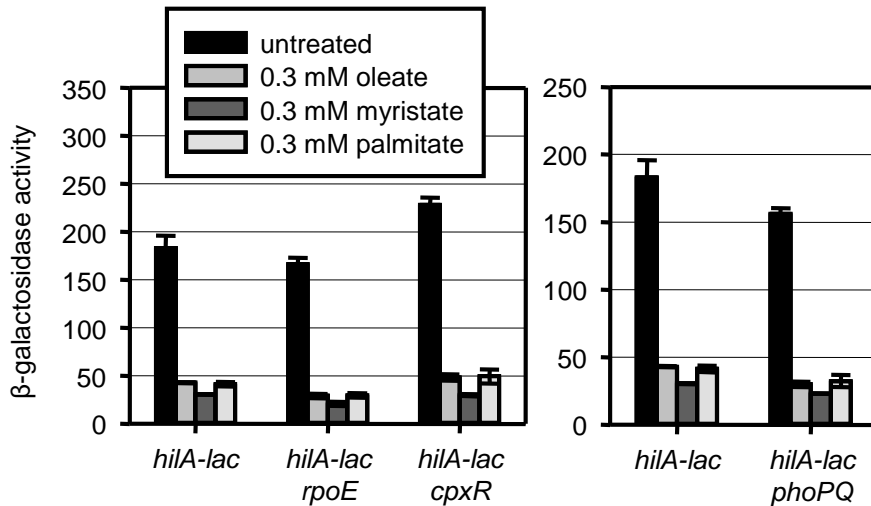

**Figure S3.** External free LCFAs repress *hilA* independently of periplasmic stress regulators or the PhoPQ two-component regulatory system. (A)  $\beta$ -galactosidase activity in strains containing a *hilA-lac* transcriptional fusion and the indicated mutations grown under SPI1 inducing conditions in the absence or presence of 0.3 mM oleate, 0.3 mM myristate, or 0.3 mM palmitate. (B)  $\beta$ -galactosidase activity in strains containing a *hilA-lac* transcriptional fusion in the wt of *phoPQ* background grown under SPI1 inducing conditions in the absence or presence of 0.3 mM oleate, 0.3 mM myristate, or 0.3 mM palmitate.  $\beta$ -galactosidase activity is reported as mean  $\pm$  standard deviation where  $n=4$ . Strains used: JS749, JS1069, JS2073, JS2074.
