# Supplementary material for: Intestinal Long-Chain Fatty Acids Act as a Direct Signal To Modulate Expression of the Salmonella Pathogenicity Island 1 Type III Secretion System
Source: PubMed Central journal article supplement — mBio. 2016 Feb 16;7(1):e02170-15. doi: 10.1128/mBio.02170-15 (PMC4752608; doi:10.1128/mbio.02170-15), 2016-02-16
Supplement: mbo001162701sf4.pdf [file mbo001162701sf4.pdf]

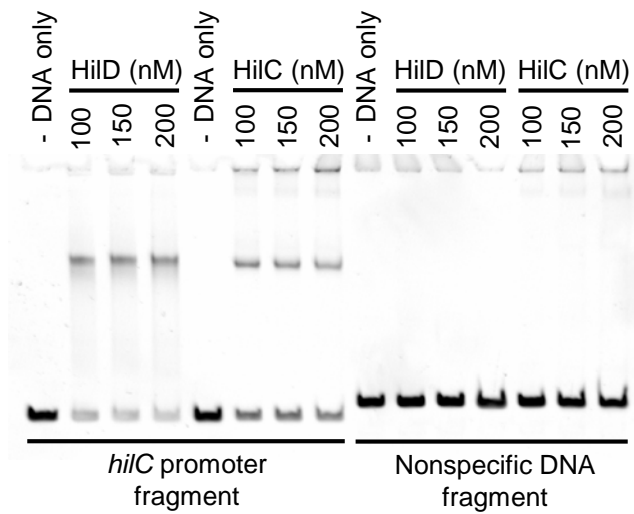

**Figure S4.** HilD and HilC proteins bind a 210-bp fragment of the *hilC* promoter. All lanes contain 10 nM DNA and 0.05% Tergitol NP-40 detergent. A 258-bp nonspecific DNA fragment was used as a control.
